# Supplementary material
Source: PubMed Central journal article supplement (PMC5655058)

**Supplemental Figure 1.** Flow diagram illustrating the step-wise exclusion of subjects based on exclusion and data quality criteria

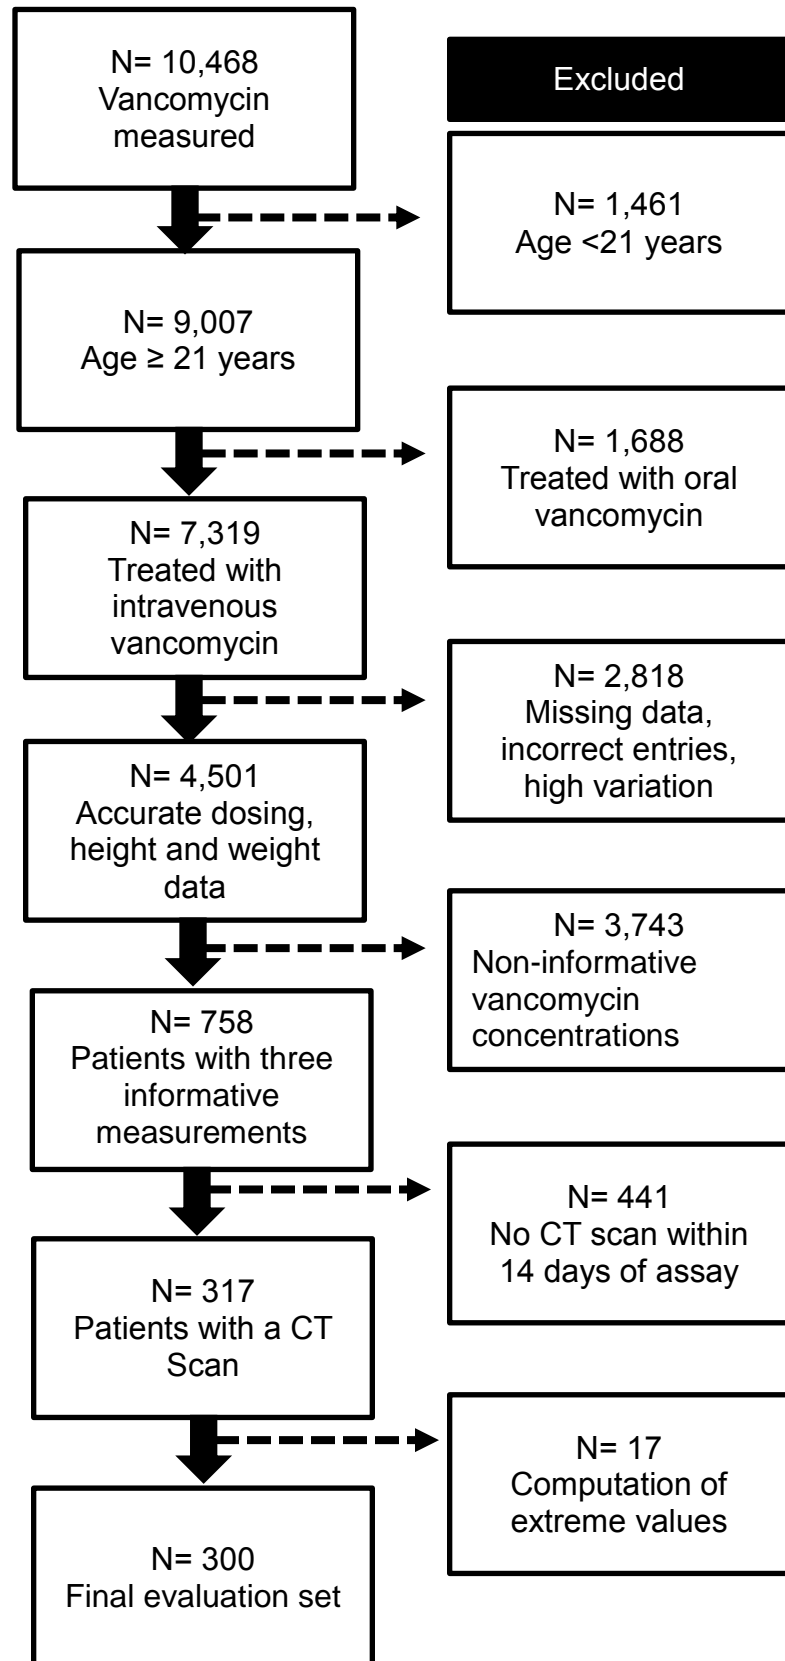

**Supplemental Figure 2.** Cross-sectional Computed Tomography image from T11 to L5 illustrating “cut-off” regions (white arrows) limiting calculation of body and subcutaneous area and volume parameters but not impacting other morphomic parameter estimates

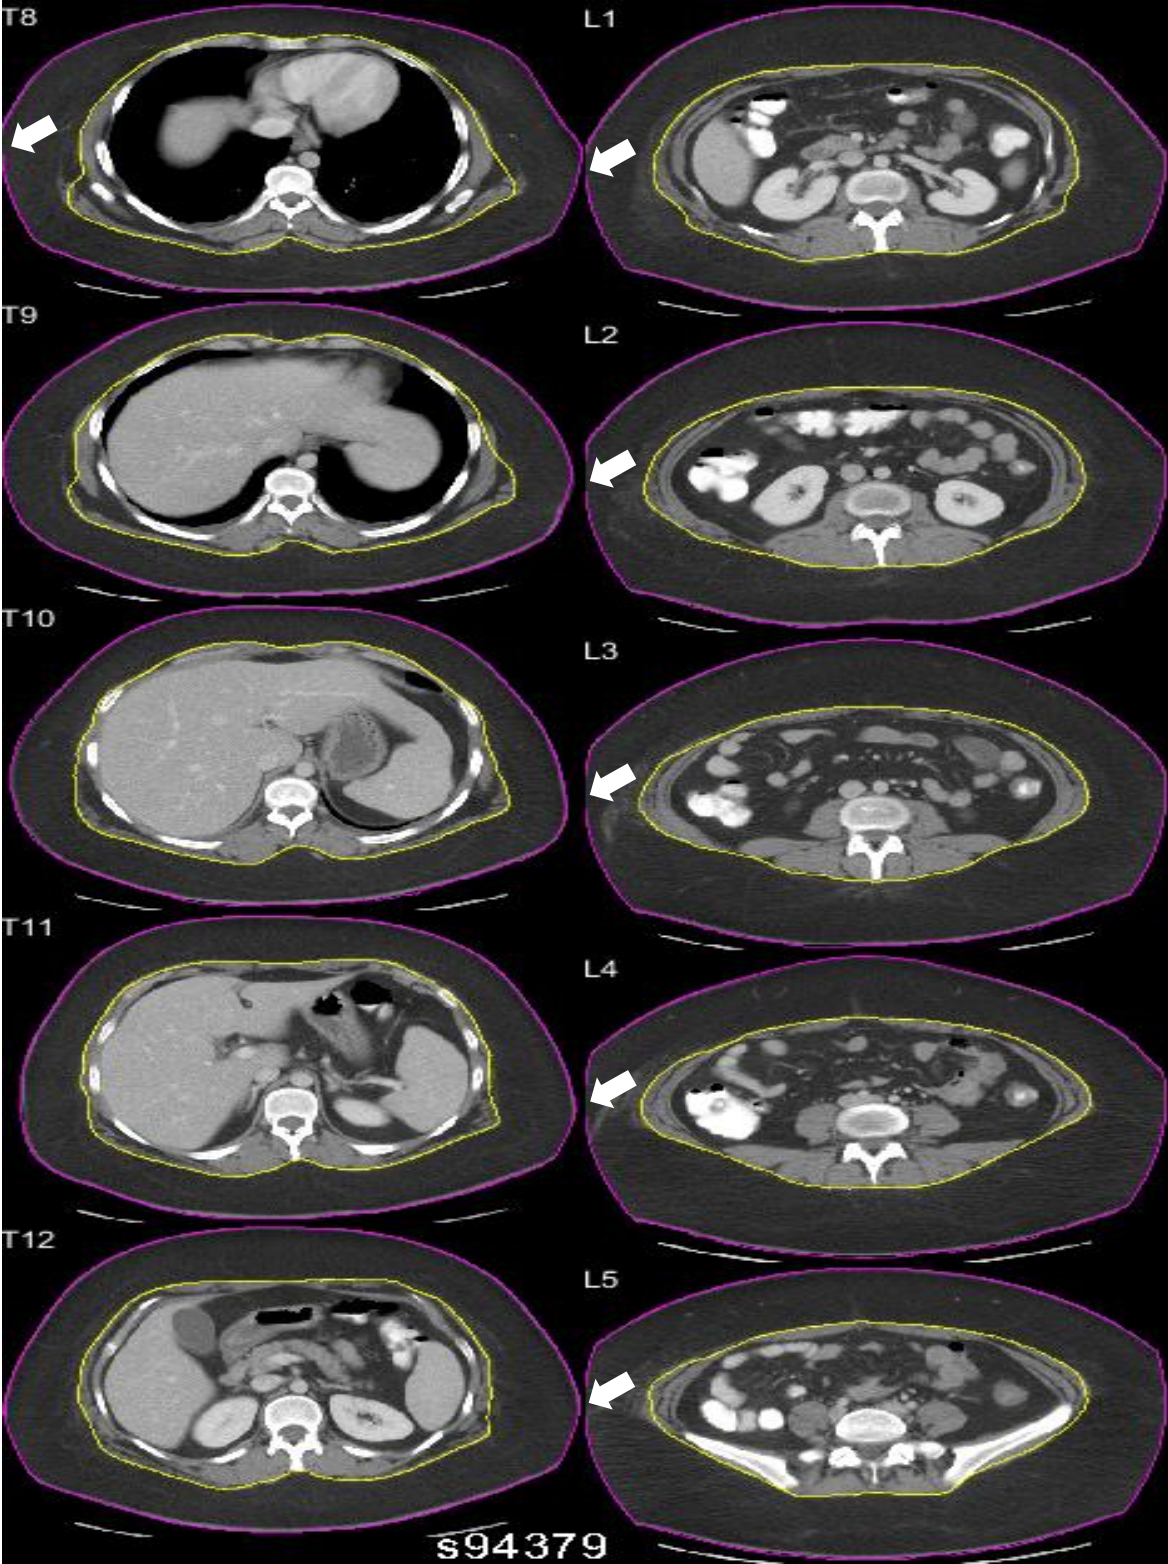

**Supplemental Figure 3.** Scatter and linear fit plots illustrate the relationship of key parameters and vancomycin clearance to generate a composite parameter predictive of vancomycin clearance

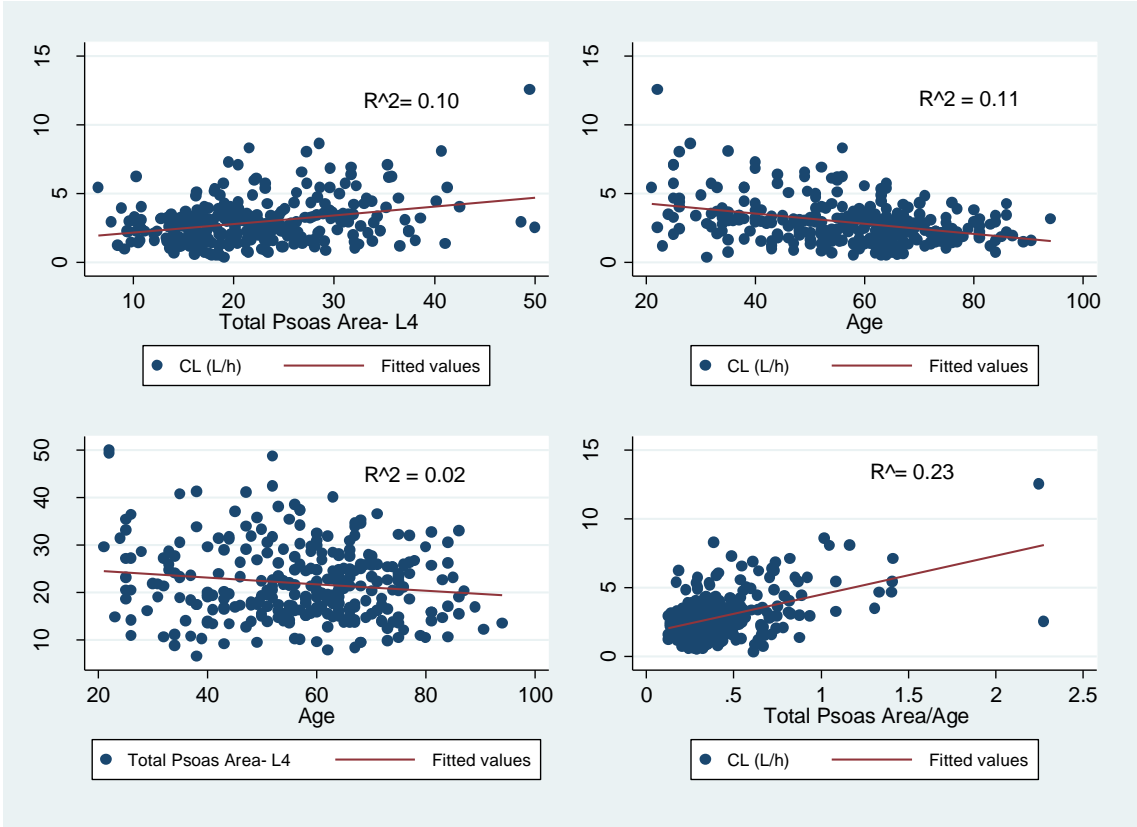

Supplement: AAC.01402-17_zac011176613s1.pdf [file AAC.01402-17_zac011176613s1.pdf]
